# Supplementary material for: Exploring the membrane fluidity of phenyl boronic acid functionalized polymersomes using the FRAP technique and their application in the pH-sensitive release of curcumin
Source: Royal Society of Chemistry journal article supplement (doi:10.1039/d2nj01330d), 2022-01-01
Supplement: d2nj01330d1.pdf [file d2nj01330d1.pdf]

**Supporting Information**  
**Of**  
**Exploring the membrane fluidity of phenyl boronic acid functionalized**  
**polymersomes using FRAP technique and application in pH sensitive**  
**release of curcumin**

Deepthi Priyanka Damera and Amit Nag\*

*Department of Chemistry, BITS-Pilani Hyderabad Campus, Hyderabad, India -500078*

*E-mail: [amitnag@hyderabad.bits-pilani.ac.in](mailto:amitnag@hyderabad.bits-pilani.ac.in)*

**Contents:**

Figure S1: Synthetic route for preparation of active-targeting pluronic copolymer F127-PBA

Figure S2: <sup>1</sup>H NMR and FTIR spectra of F108 and F108-PBA

Video S1. Formation of the GUVs loaded with rhodamine 6G

Video S2. FRAP of F127 vesicles

Video S3: FRAP of F127-PBA vesicles

Video S4. FRAP of F108 vesicles

Video S5. FRAP of F108-PBA vesicles

Figure S3. (a) UV-Vis absorption and (b) Fluorescence spectra of F108-PBA in the presence of different concentration of curcumin in aqueous medium.

Figure S4. (a) UV-Vis absorption and (b) Fluorescence spectra of F127-PBA in the presence of different concentration of curcumin in aqueous medium.

Figure S5. <sup>1</sup>H NMR spectra of F127-PBA, curcumin and the complex.

Figure S6. Photograph of F127 and F127-PBA polymersomes solutions loaded curcumin.

Figure S7. Calibration of curcumin using 50%(v/v) methanol as the solvent

Figure S8. DLS data of vesicles loaded with curcumin (a) F127 (b) F108 (c) F127-PBA (d) F108-PBA.

Method S1. HPLC procedure for curcumin

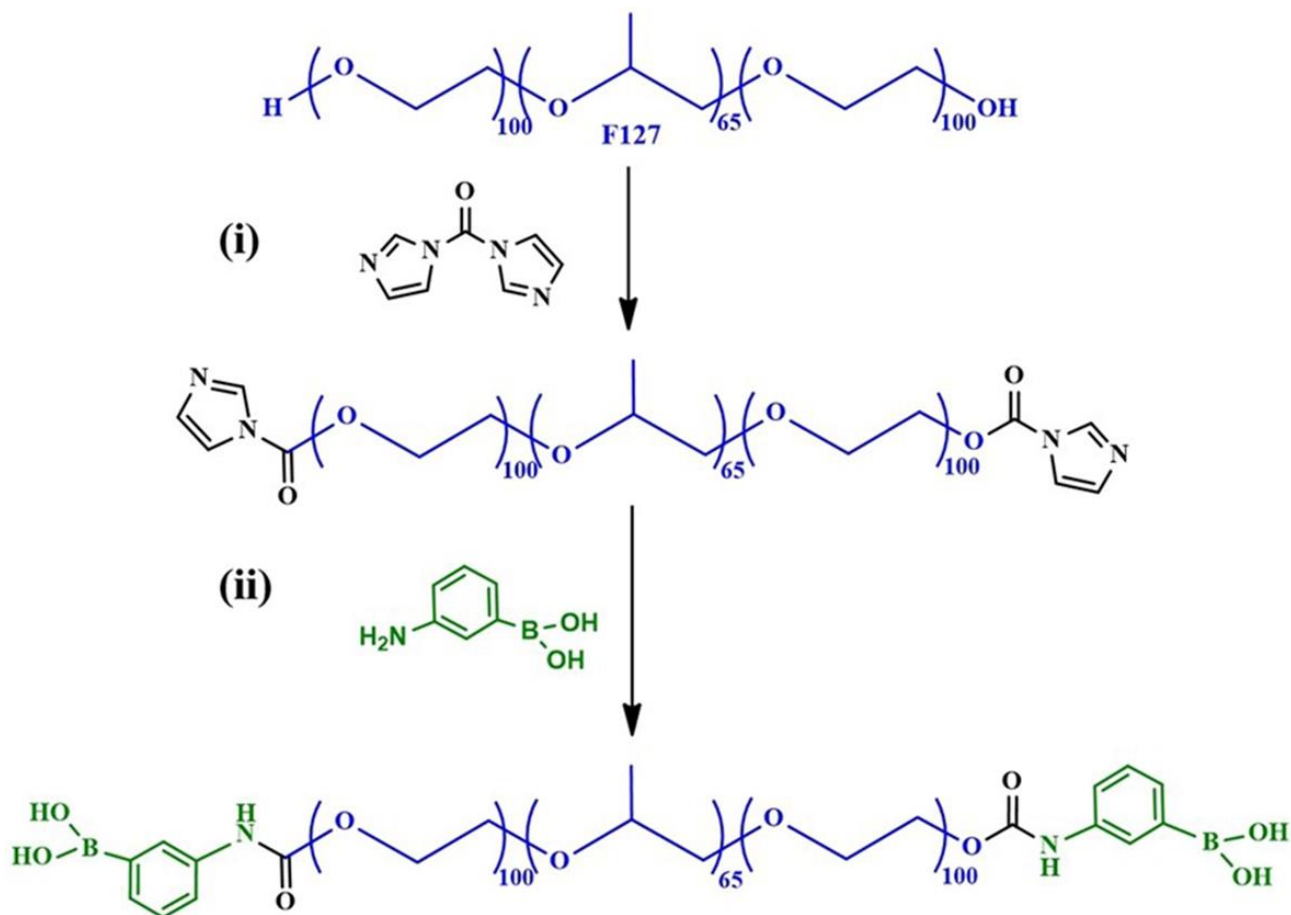

**Figure S1.** Synthetic route of active-targeting pluronic copolymer (F127-PBA); Reaction conditions: (i) anhydrous dichloromethane; (ii) dimethyl sulfoxide, 0.2% DMAP, at room temperature for 48 h.

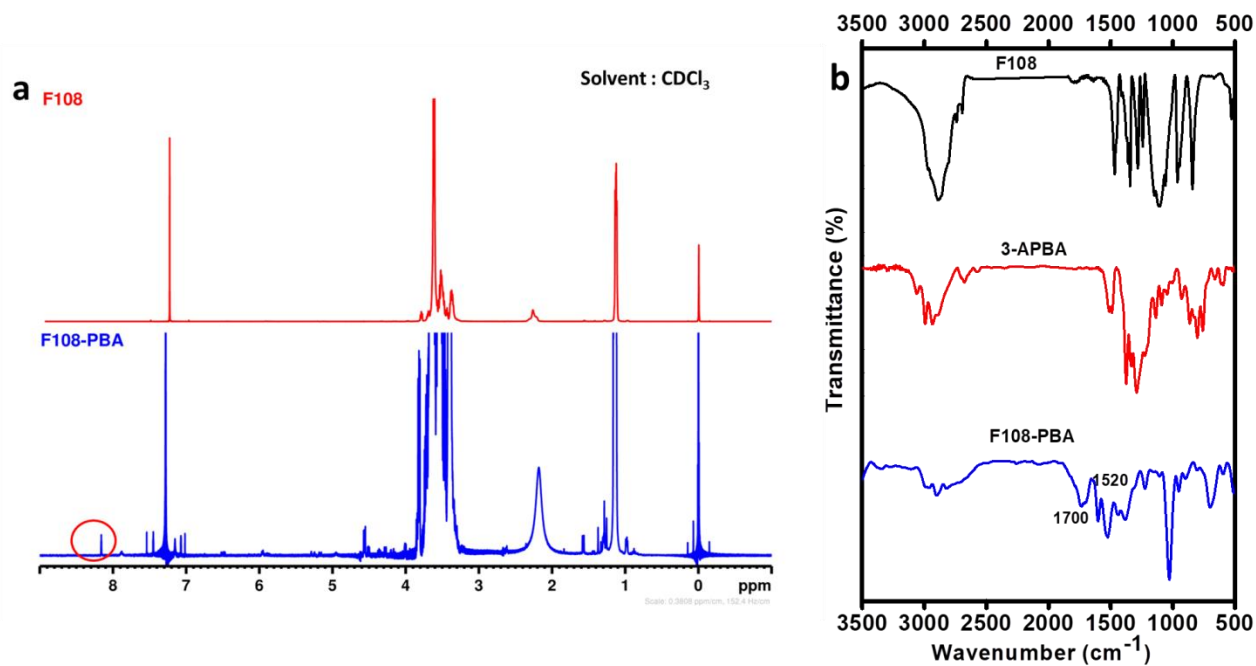

**Figure S2.** (a)  $^1\text{H}$  NMR spectra of F108 and F108-PBA, and  $\text{CDCl}_3$  was used as the solvent. (b) FTIR spectra of F108, 3-APBA and F108-PBA. Red circle indicates the peak at  $\delta$ : 8.2 ppm corresponding to proton of  $(-\text{B}(\text{OH})_2)$ .

**Videos S1-S5:** Given separately as individual files.

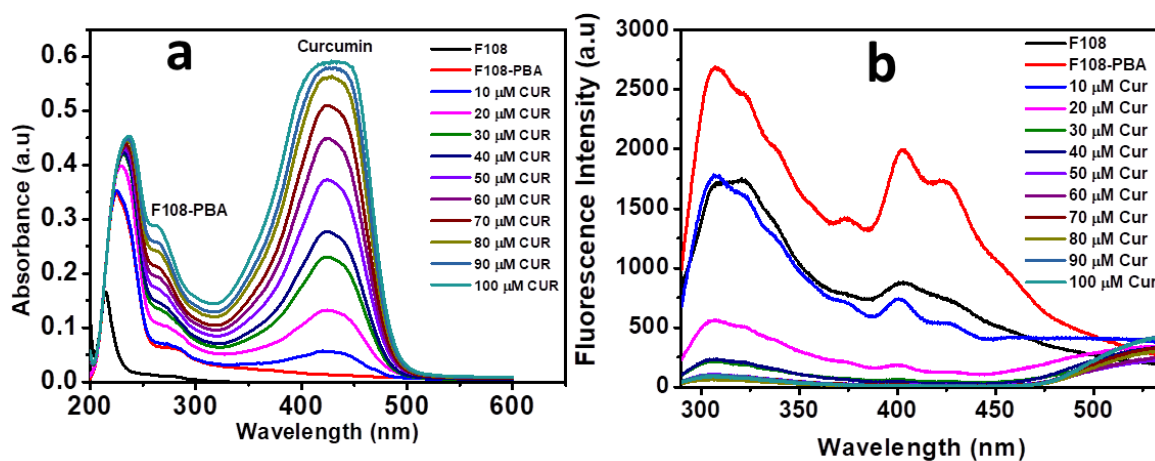

**Figure S3.** (a) UV-Vis absorption and (b) Fluorescence spectra of F108-PBA in the presence of different concentration of curcumin in aqueous medium.

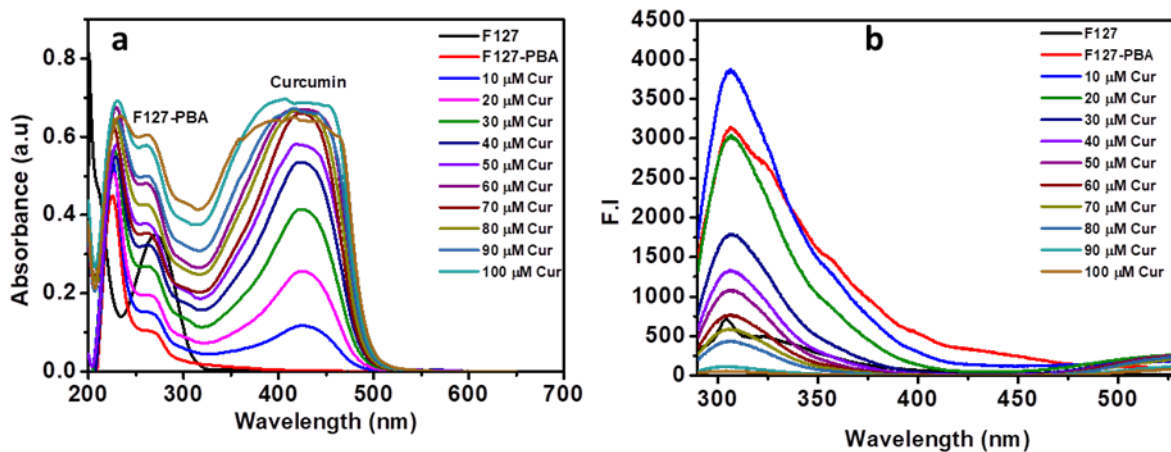

**Figure S4.** (a) UV-Vis absorption and (b) Fluorescence spectra of F127-PBA in the presence of different concentration of curcumin in aqueous medium.

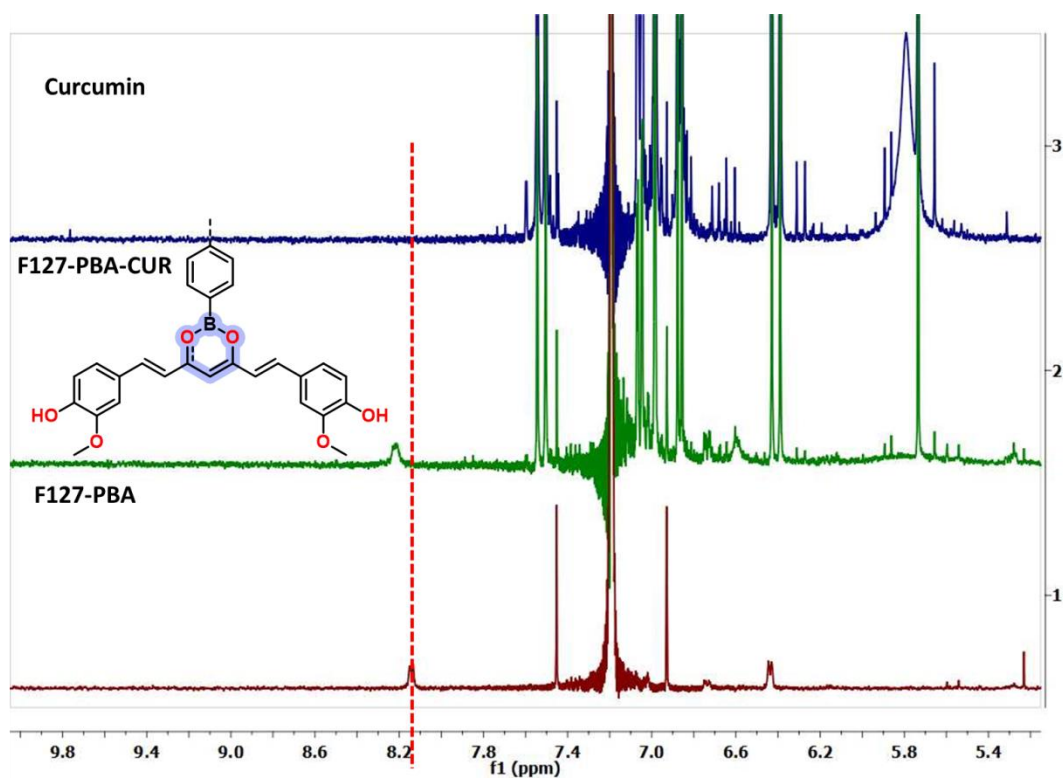

**Figure S5.** <sup>1</sup>H NMR spectra of F127-PBA, curcumin and the complex.

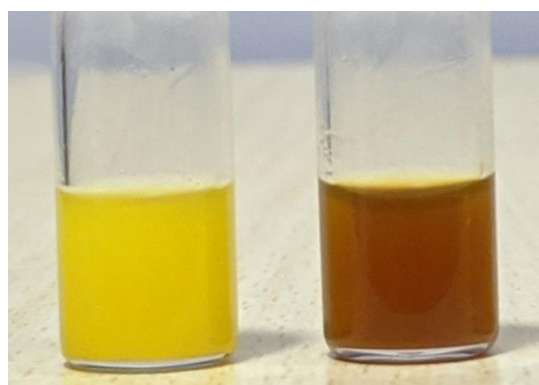

**F127      F127-PBA**

**Figure S6.** Photograph of F127 and F127-PBA polymersomes solutions loaded with curcumin.

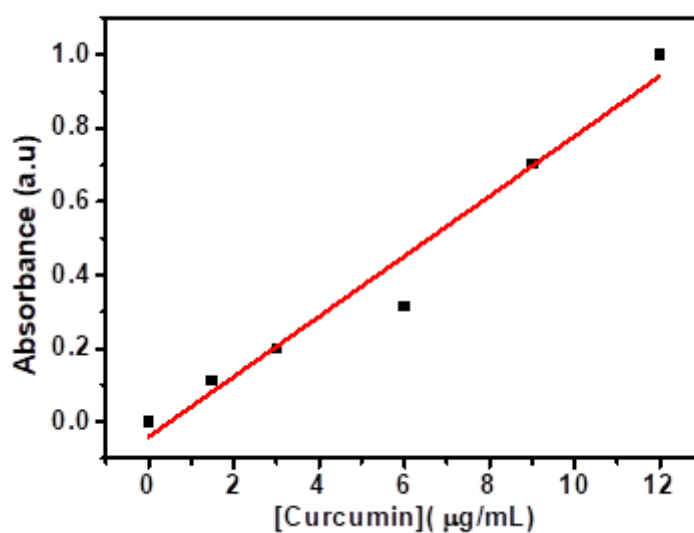

**Figure S7.** Calibration of curcumin using 50% (v/v) methanol as the solvent.

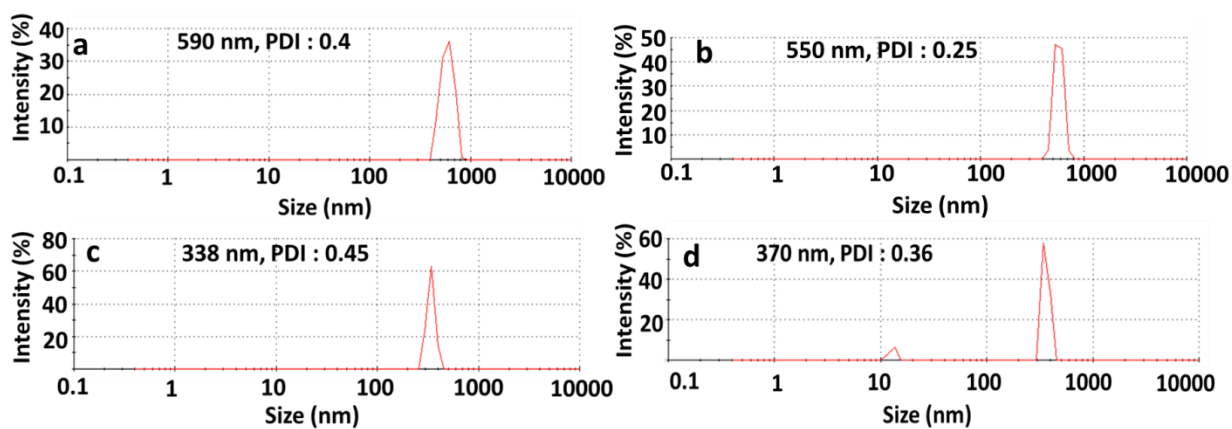

**Figure S8.** DLS data of vesicles loaded with curcumin (a) F127 (b) F108 (c) F127-PBA(d) F108-PBA.

**Method S1: HPLC procedure for curcumin determination**

All the analysis of curcumin was determined by a (UFLC, Shimadzu, Japan) instrument system with a RP-18 column (shiseido C18; 150 mm length × 4.6 mm width; 5 μm particle size) with an isocratic pump (Shimadzu-LC-20AD prominence) and an autosampling device (Shimadzu-SIL-20A prominence). The detection was performed using a UV detector (Shimadzu UV-Vis Abs). The curcumin samples were analysed according to the following method: isocratic method (50% of water with 2% of acetic acid (A) and 50% acetonitrile (B) and with a flow-rate of 1 mL/min. Detection was at 427 nm and the run time of 15 minutes. The curcumin retention time was 7.8 minutes. Injection volume was 20 μL.
